# Supplementary material
Source: Springer Nature journal article supplement (https://www.springermedizin.de/resource/supplementary/12985_2013_2428_MOESM1_ESM.pdf/9607060)
Supplement: MOESM1 [file 9607060]

## A. HTNV strip

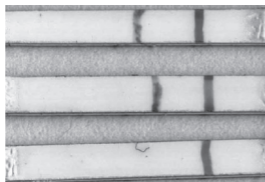

: HFRS patient; HTNV

: HFRS patient; SEOV

: Healthy donor

## B. PUUV strip

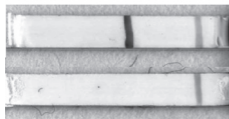

: NE patient; PUUV

: Healthy donor

## C. ANDV strip

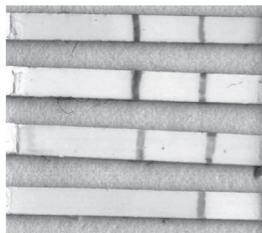

: HPS patient; SNV

: HPS patient; ANDV

: HPS patient; LANV

: Healthy donor
